# Supplementary material for: Carfilzomib, Lenalidomide, and Dexamethasone Followed by Salvage Autologous Stem Cell Transplant with or without Maintenance for Relapsed or Refractory Multiple Myeloma
Source: MDPI journal article supplement (doi:10.3390/cancers13184706), 2021-09-20
Supplement: s1 [file s1]

## Supplement

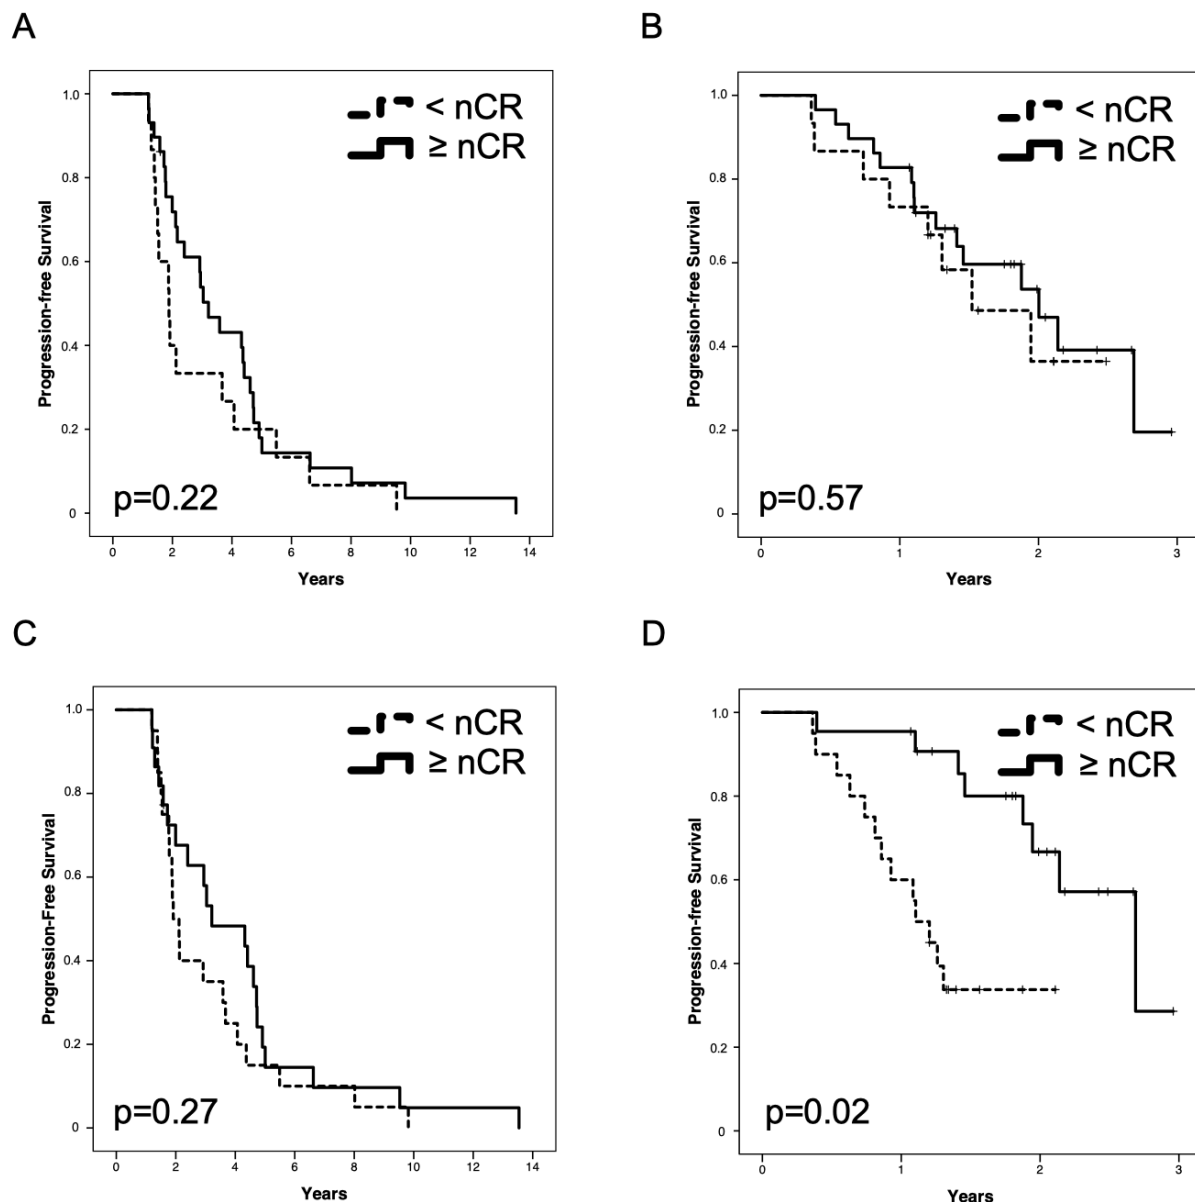

**Supplementary Figure S1:** Kaplan-Meier plots of progression-free survival after frontline (A, C) and salvage HDCT/ASCT (B, D) according to best response ( $\geq nCR$  vs.  $< nCR$ ) during frontline (A, B) and salvage (C, D) treatment. P-values were determined by Cox regression analysis.

**Supplementary Table S1: Adverse events, antimicrobial management and transfusions during frontline and salvage HDCT/ASCT** Data are n/N (%) or median (range) \*covering pseudomonas, <sup>§</sup>antibiotics with exclusive activity against gram-positive bacteria, <sup>§</sup>covering aspergillus. *i.v.*: intravenous

| Variable                 | Frontline transplant | Salvage transplant | p    |
|--------------------------|----------------------|--------------------|------|
| <b>Infection</b>         | 40/43 (93%)          | 41/44 (93%)        | 1.0  |
| <b>Site of infection</b> |                      |                    |      |
| Fever of unknown origin  | 32/43 (74%)          | 29/44 (66%)        | 0.45 |
| Sepsis                   | 6/43 (14%)           | 5/44 (11%)         | 1.0  |
| Soft tissue              | 1/43 (2%)            | 2/44 (5%)          | 1.0  |
| Respiratory              | 1/43 (2%)            | 3/44 (7%)          | 0.63 |
| Gastrointestinal         | 0/43                 | 2/44 (5%)          | 0.5  |

|                                               |             |             |                  |
|-----------------------------------------------|-------------|-------------|------------------|
| <b>Urogenital</b>                             | 0/43        | 0/44        |                  |
| <b>Blood cultures</b>                         |             |             |                  |
| <b>Bacteremia</b>                             | 10/41 (24%) | 6/39 (15%)  | 0.39             |
| Gram-positive                                 | 8/41 (20%)  | 5/39 (13%)  | 0.29             |
| Gram-negative                                 | 2/41 (5%)   | 2/39 (5%)   | 1.0              |
| <b>Fungemia</b>                               | -           | 1/39 (3%)   | 1.0              |
| <b>Erythrocyte transfusions</b>               | 18/44 (41%) | 12/44 (27%) | <b>0.04</b>      |
| 1                                             | -           | 4/44 (9%)   |                  |
| 2                                             | 16/44 (36%) | 8/44 (18%)  |                  |
| >2                                            | 2/44 (5%)   | -           |                  |
| <b>Platelet transfusions</b>                  | 24/44       | 23/44       | 0.54             |
| 1                                             | 23/44       | 19/44       |                  |
| >1                                            | 1/44        | 4/44        |                  |
| <b>I.v. antibiotics</b>                       |             |             |                  |
| Median Duration [days]                        | 8 (0-18)    | 8 (0-34)    | 0.69             |
| Broad-spectrum Beta-lactam*                   | 39/43 (91%) | 32/44 (73%) | <b>0.02</b>      |
| Carbapenem                                    | 22/43 (51%) | 19/44 (43%) | 0.66             |
| Broad-spectrum Beta-lactam* and/or Carbapenem | 39/43 (91%) | 34/44 (77%) | 0.11             |
| Gram-positive <sup>s</sup>                    | 10/43 (23%) | 10/44 (23%) | 1.0              |
| Reserve antibiotics                           | -           | -           |                  |
| <b>Antimycotics<sup>&amp;</sup></b>           | 0/43        | 1/44 (2%)   | 1.0              |
| <b>Diarrhea</b>                               |             |             |                  |
| Frequency                                     | 36/43 (84%) | 41/44 (93%) | 0.13             |
| Median Duration [days]                        | 4.5 (0-17)  | 8 (0-16)    | <b>&lt;0.001</b> |
| <b>Mucositis</b>                              | 41/42 (98%) | 39/41 (95%) | 0.31             |
| Grade 0                                       | 1/42 (2%)   | 2/41 (5%)   |                  |
| Grade 1                                       | 13/42 (31%) | 11/41 (27%) |                  |
| Grade 2                                       | 15/42 (36%) | 9/41 (22%)  |                  |
| Grade 3                                       | 13/42 (31%) | 18/42 (43%) |                  |
| Stage 4                                       | -           | 1/41 (2%)   |                  |
| <b>Pain scale maximum [median]</b>            | 5 (0-9)     | 5 (0-8)     | 0.23             |
| <b>Continuous i.v. antiemetics</b>            | -           | 1/43 (2%)   | 1.0              |
| <b>Parenteral nutrition</b>                   | 4/44 (9%)   | 3/44 (7%)   | 1.0              |
| <b>Continuous i.v. opioids</b>                | 6/44 (14%)  | 6/44 (14%)  | 1.0              |
| <b>Intensive care unit admission</b>          | -           | 2/44 (5%)   | 0.5              |
| <b>Dialysis</b>                               | -           | -           |                  |
| <b>Mechanical ventilation</b>                 | -           | 1/44 (2%)   | 1.0              |
| <b>Catecholamines</b>                         | -           | 1/44 (2%)   | 1.0              |
